# Supplementary material for: Age relationships with telomere length, body weight and body length in wild dugong (Dugong dugon)
Source: PeerJ. 2020 Nov 11;8:e10319. doi: 10.7717/peerj.10319 (PMC7666544; doi:10.7717/peerj.10319)
Supplement: Supplemental Information 2 [file peerj-08-10319-s002.xlsx]

## Sheet: Sheet1
Raw data of all 25 dugong use in this study
Number	ID	sex	age	du length	du weight	rTL1	rTL2	rTL3	mean	Lacation
1	307-L	F	54	277	358	0.00901546	0.0145748	0.00801741	0.0105359	Libong island, Trang
2	300-U	F	11	224	235	0.191189	0.651894	0.523679	0.455587	Samran Beach, Trang
3	299-U	F	63	281	335	0.0186063	0.00730905	0.00989017	0.0119352	Libong island, Trang
4	292-U	F	41	282	305	nd	nd	nd	nd	Ao Nang Beach, Krabi
5	291_L	F	67	263	317	0.00763526	0.00653829	0.00676273	0.00697876	Ko Sarai island, Satun
6	285-U	F	24	200	nd	nd	nd	nd	nd	Map Ta Phut, Rayong
7	283-L	F	38	300	nd	nd	nd	nd	nd	Ko Lanta Yai island, Krabi
8	272-U	M	13	245	nd	nd	nd	nd	nd	Sattahip, Chonburi
9	258-U	F	12	231	200	nd	nd	nd	nd	Bang Sare, Chonburi
10	243-U	M	23	275	310	nd	nd	nd	nd	Ko Pa Yung island, Phangnga
11	236-L	F	69	250	nd	nd	nd	nd	nd	Ko Klang island, Phangnga
12	234-L	F	27	256.5	297	nd	nd	nd	nd	Ko Yao island, Phangnga
13	147-U	M	6	nd	nd	0.452425	0.653937	0.536385	0.547582	Pak Nam Laem Sing, Chanthaburi
14	143-U	F	5	199.5	142	0.482737	0.517389	0.654354	0.551493	Libong island, Trang
15	129-L	F	43	225	258	nd	nd	nd	nd	Khao Mai Kaeo, Trang
16	098-U	M	16	214	180	0.0286576	0.375906	0.127334	0.177299	Kram, Rayong
17	084-U	M	8	219	184	0.237732	0.385729	0.305184	0.309548	Wichit, Phuket
18	078-U	F	34	231	151	0.0102317	0.0424079	0.0126284	0.021756	Lamae, Chumphon
19	58	M	15	250	245	0.1658	0.345082	0.109837	0.206906	Libong island, Trang
20	57	F	14	258	281	0.164049	0.261033	0.124092	0.183058	Libong island, Trang
21	48	F	43	271	293	0.0163948	0.0224001	0.0119653	0.0169201	Suk Samran, Ranong
22	47	M	6	221	143	0.592368	0.572267	0.590989	0.585208	Ko Yao island, Phangnga
23	38	M	14	257	250	nd	nd	nd	nd	Libong island, Trang
24	36	F	34	273	272	0.0563328	0.0729872	0.050011	0.059777	Bo Hin, Trang
25	16	M	16	254	nd	nd	nd	nd	nd	Muang Krabi, Krabi
